# Supplementary material
Source: Springer Nature journal article supplement (https://www.springermedizin.de/resource/supplementary/12967_2008_278_MOESM11_ESM.pdf/9576090)

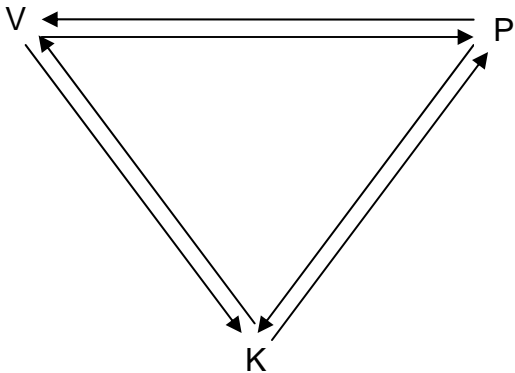

cy5 → cy3

Supplement: MOESM11 [file 9576090]
